# Supplementary material
Source: PubMed Central journal article supplement (PMC4030540)
Supplement: NIHMS462656-supplement-supplemental_data.pdf [file NIHMS462656-supplement-supplemental_data.pdf]

## Supplemental Table S1. Pathways Predicted to be Altered by miR-24 and miR-24-2\*

## Targets

| miR-24-2*                                                       | miR-24                                              |
|-----------------------------------------------------------------|-----------------------------------------------------|
| RAC1 signaling pathway                                          | <b>Regulation of RhoA activity</b>                  |
| IL4-mediated signaling events                                   | IL2-mediated signaling events                       |
| ErbB1 downstream signaling                                      | Signaling events mediated by TCPTP                  |
| Lissencephaly gene (LIS1) in neuronal migration and development | IL2-mediated signaling events mediated by STAT5     |
| RhoA signaling pathway                                          | Nectin adhesion pathway                             |
| <b>Regulation of RhoA activity</b>                              | PDGF-beta signaling pathway                         |
| Canonical Wnt signaling pathway                                 | EPO signaling pathway                               |
| Calcineurin-regulated NFAT-dependent transcription lymphocytes  | GMCSF-mediated signaling events                     |
| Cellular roles of Anthrax toxin                                 | IL12-mediated signaling events                      |
| Calcium signaling in the CD4+ TCR pathway                       | Regulation of RAC1 activity                         |
| Regulation of Telomerase                                        | Direct p53 effectors                                |
| <b>IL6-mediated signaling events</b>                            | TRK receptor signaling mediated by the MAPK pathway |
| Glucocorticoid receptor regulatory network                      | IL27-mediated signaling events                      |
| IL2 signaling events mediated by PI3K                           | IL3-mediated signaling events                       |
| Class PI3K signaling events                                     | Signaling events HDAC Class I                       |
| Insulin-mediated glucose transport                              | <b>IL6-mediated signaling events</b>                |
| Regulation of cytoplasmic and nuclear SMAD2/3 signaling         | IL23-mediated signaling events                      |
| Ceramide signaling pathway                                      | FAS (CD95) signaling pathway                        |
| VEGFR1 specific signals                                         | PDGF receptor signaling network                     |
| Caspase cascade in apoptosis                                    | CXCR4-mediated signaling events                     |

Pathway analysis obtained from National Cancer Institute [42]
